# Supplementary material
Source: publisher site journal article supplement (https://www.spandidos-publications.com/5123/downloadSupplementary)

Figure S1. Patient selection diagram. Patients treated with atezolizumab plus CE between August 2019 and September 2020 were included in the study. CE, carboplatin and etoposide.

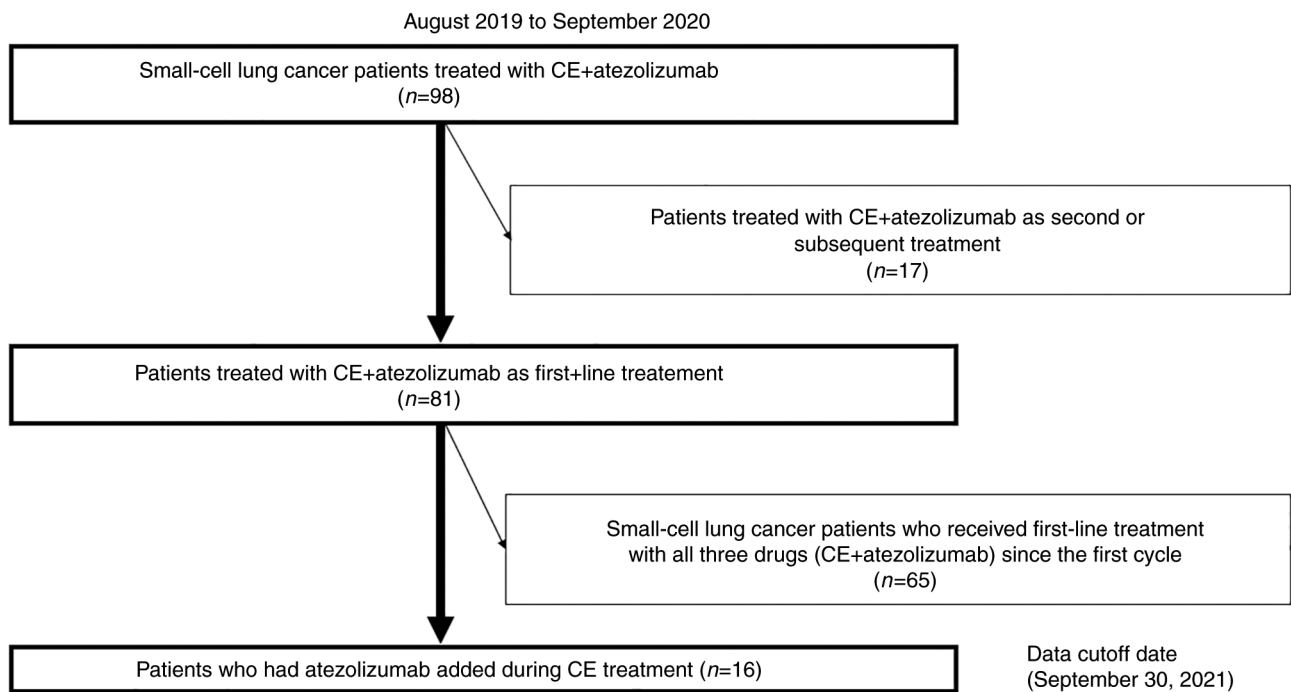

Supplement: Supplementary file 1 [file downloadSupplementary]
